# 1 **GAVIN - Gene-Aware Variant INterpretation** 2 **for medical sequencing**

3  
4 K. Joeri van der Velde<sup>1,2</sup>, k.j.van.der.velde@umcg.nl

5 Eddy N. de Boer<sup>2</sup>, e.n.de.boer@umcg.nl

6 Cleo C. van Diemen<sup>2</sup>, c.c.van.diemen@umcg.nl

7 Birgit Sikkema-Raddatz<sup>2</sup>, b.sikkema01@umcg.nl

8 Kristin M. Abbott<sup>2</sup>, k.m.abbott@umcg.nl

9 Alain Knopperts<sup>2</sup>, a.p.knopperts@umcg.nl

10 Lude Franke<sup>2</sup>, ludefranke@gmail.com

11 Rolf H. Sijmons<sup>2</sup>, r.h.sijmons@umcg.nl

12 Tom J. de Koning<sup>2</sup>, t.j.de.koning@umcg.nl

13 Cisca Wijmenga<sup>2</sup>, cisca.wijmenga@gmail.com

14 Richard J. Sinke<sup>2</sup>, r.j.sinke@umcg.nl

15 Morris A. Swertz<sup>\*1,2</sup>, m.a.swertz@gmail.com

16

17 <sup>1</sup> University of Groningen, University Medical Center Groningen, Genomics Coordination Center,  
18 Groningen, The Netherlands

19 <sup>2</sup> University of Groningen, University Medical Center Groningen, Department of Genetics,  
20 Groningen, The Netherlands

21 <sup>\*</sup> To whom correspondence should be addressed. Tel: +31 50 3617229; Fax: +31 50 3617231;

22 Email: m.a.swertz@gmail.com

23

## 24 **ABSTRACT**

25 Here, we present GAVIN, a new method that delivers accurate classification of variants for next-  
26 generation sequencing molecular diagnostics. It is based on gene-specific calibrations of allele  
27 frequencies (from the ExAC database), effect impact (using SnpEff) and estimated  
28 deleteriousness (CADD scores) for >3,000 genes. In a benchmark on 18 clinical gene sets, we

29 achieved a sensitivity of 91.6%, with a specificity of 78.2%. This accuracy was unmatched by 12  
30 other tools we tested. We provide GAVIN as an online MOLGENIS service to annotate VCF files,  
31 and as open source executable for use in bioinformatic pipelines. It can be found at  
32 <http://molgenis.org/gavin>.

33

#### 34 **KEYWORDS**

35 clinical next-generation sequencing, variant classification, automated protocol, gene-specific  
36 calibration, allele frequency, protein impact, pathogenicity prediction

37

#### 38 **BACKGROUND**

39 Only a few years ago, the high costs and technological challenges of whole exome and whole  
40 genome sequencing were limiting their application. Today, the practice of human genome  
41 sequencing has become routine even within the healthcare sector. This is leading to new and  
42 daunting challenges for clinical and laboratory geneticists[1]. Interpreting the thousands of  
43 variations observed in DNA and determining which are pathogenic and which are benign is still  
44 difficult and time-consuming, even when variants are prioritized by state-of-the-art *in silico*  
45 prediction tools and heuristic filters[2]. Using the current, largely manual, variant classification  
46 protocols, it is not feasible to assess the thousands of genomes per year now produced in a  
47 single hospital. It is the challenge of variant assessment which now impedes the effective uptake  
48 of next-generation sequencing into routine medical practice.

49 The recently introduced CADD[3] scores are a promising alternative[4]. These are  
50 calculated on the output of multiple *in silico* tools in combination with other genomic features.  
51 They trained a computer model on variants that have either been under long-term selective  
52 evolutionary pressure or none at all. The result was an estimation of deleteriousness for variants  
53 in the human genome, whether already observed or not. It has been shown to be a strong and  
54 versatile predictor for pathogenicity[3]. These scores may be used to define a classifier that labels  
55 a variant with a CADD score of >15 as probably pathogenic and <15 as benign, as suggested by  
56 the CADD authors[5]. Unfortunately, clinicians and laboratories cannot rely on this single

57 threshold approach. We have shown that individual genes differ in their cut-off thresholds for what  
58 should be considered the optimal boundary between pathogenic or benign[4]. This issue has  
59 been partly addressed by MSC[6] (Mutation Significance Cutoff), which provides gene-based  
60 CADD cut-off values to remove inconsequential variants safely from sequencing data. While MSC  
61 aims to quickly and reliably reduce the number of benign variants left to interpret, it was not  
62 developed to detect/classify pathogenic variants.

63 The challenge is thus to find robust algorithms that classify both pathogenic and benign  
64 variants accurately and that fit into existing best practice, diagnostic filtering protocols[7].  
65 Implementing such tools is not trivial because genes have different levels of tolerance to various  
66 classes of variants that may be considered harmful[8]. In addition, the pathogenicity estimates for  
67 benign variants are intrinsically lower because these are more common and of less severe  
68 consequence on protein transcription. Comparing the prediction score distributions of pathogenic  
69 variants with those of typical benign variants is therefore biased and questionable. Using such an  
70 approach means it will be unclear how well a predictor truly performs if a benign variant shares  
71 many properties with known pathogenic variants. Here, we present GAVIN (Gene-Aware Variant  
72 INterpretation), a new method that addresses these issues by gene-specific calibrations on  
73 closely matched sets of variants. GAVIN delivers accurate and reliable automated classification of  
74 variants for clinical application.

75

## 76 **RESULTS**

77

### 78 **Development of GAVIN**

79 GAVIN classifies variants as Benign, Pathogenic or a Variant of Uncertain Significance (VUS). It  
80 considers ExAC[8] minor allele frequency, SnpEff[9] impact and CADD score using gene-specific  
81 thresholds. For each gene, we ascertained ExAC allele frequencies and effect impact  
82 distributions of variants described in ClinVar (November 2015 release) [10] as pathogenic or likely  
83 pathogenic. From the same genes we selected ExAC variants that were not present in ClinVar as  
84 a benign reference set. We stratified this benign set to match the pathogenic set with respect to

85 the effect impact distribution and minor allele frequencies (MAF). Using these comparable variant  
86 sets we calculated gene-specific mean values for CADD scores and minor allele frequencies as  
87 well as 95<sup>th</sup> percentile sensitivity/specificity thresholds for both benign and pathogenic variants.  
88 We used fixed genome-wide classification thresholds as a fall-back strategy based on CADD  
89 scores < 15 for benign and > 15 for pathogenic[5] and on a MAF threshold of > 0.00474, which  
90 was the mean of all gene-specific pathogenic 95<sup>th</sup> percentile thresholds. This allowed  
91 classification when insufficient variant training data were available to allow for gene-specific  
92 calibrations, or when the gene-specific rules failed to classify a variant. Based on the gene  
93 calibrations we then implemented GAVIN, which can be used online or via commandline (see  
94 <http://molgenis.org/gavin>) to perform variant classification.

95

#### 96 **Performance benchmark**

97 To test the robustness of GAVIN, we evaluated its performance using six benchmark variant  
98 classification sets from VariBench[11], MutationTaster2[12], ClinVar (only recently added variants  
99 that were not used for calibrating GAVIN), and a high-quality variant classification list from the  
100 University Medical Center Groningen (UMCG) genome diagnostics laboratory. These sets and  
101 the origins of their variants and classifications are described in **Table 1**. The combined set  
102 comprises 25,765 variants (17,063 benign, 8,702 pathogenic). All variants were annotated by  
103 SnpEff, ExAC and CADD prior to classification by GAVIN. To assess the clinical relevance of our  
104 method, we stratified the combined set into clinically relevant variant subsets based on organ-  
105 system specific genes. We formed 19 subset panels such as Cardiovascular, Dermatologic, and  
106 Oncologic based on the gene-associated physical manifestation categories from Clinical  
107 Genomics Database[13]. A total of 11,679 out of 25,765 variants were not linked to clinically  
108 characterized genes and formed a separate panel (see **Table 2** for an overview). In addition, we  
109 assessed the performance of GAVIN in compared to 12 common *in silico* tools for pathogenicity  
110 prediction: MSC (using two different settings), CADD, SIFT[14], PolyPhen2[15], PROVEAN[16],  
111 Condel[17], PON-P2[18], PredictSNP2[19], FATHMM-MKL[20], GWAVA[21], FunSeq[22] and  
112 DANN[23].

113 Across all test sets, GAVIN achieved a median sensitivity of 91.6% and a median  
114 specificity of 78.2%. Other tools with >90% sensitivity were CADD (93.6%, specificity 57.1%) and  
115 MSC (97.1%, specificity 25.7%). The only other tool with >70% specificity was PredictSNP2  
116 (70.6%, sensitivity 66.8%) (see **Table 3** for an overview of tool performance). In all the clinical  
117 gene sets GAVIN scored >90% sensitivity, including >93% for Cardiovascular, Biochemical,  
118 Obstetric and Dermatologic genes. The non-clinical genes scored 71.3%. The specificity in  
119 clinical subsets ranged from 71.6% for Endocrine to 83.8% for Dental. Non-clinical gene variants  
120 were predicted at 70.2% specificity. See **Supplementary Table 1** for detailed results.

121 We illustrated the practical implications of classification sensitivity and specificity in **Table**  
122 **4**. Here, 90%/80% represents the performance of GAVIN, 90%/60% matches CADD, and  
123 70%/80% or 70%/60% can be considered averages of other methods. In a hypothetical example  
124 where 110 variants are being tested (100 benign and 10 pathogenic), the difference in predictive  
125 value between the performance opposites is over two-fold (31% positive predictive value (PPV)  
126 for 90/80% and 15% PPV for 70/60%).

127

#### 128 **Added value of gene-specific calibration**

129 We then investigated the added value of using gene-specific thresholds on classification  
130 performance relative to using genome-wide thresholds. We bootstrapped the performance on  
131 10,000 random samples of 100 benign and 100 pathogenic variants. These variants were drawn  
132 from the three groups of genes described in Materials & Methods: (1) genes for which CADD  
133 was significantly predictive for pathogenicity (n = 520), (2) genes where CADD was not  
134 significantly predictive (n = 660), and (3) genes with scarce variant data available for calibration  
135 (n = 737). For each of these sets we compared the use of gene-specific CADD and MAF  
136 classification thresholds with that of genome-wide filtering rules (CADD score < 15 and MAF >  
137 0.00474 for benign, otherwise classify as pathogenic).

138 We observed the highest accuracy on genes for which CADD had significant predictive  
139 value and for the gene-specific classification method (median accuracy = 87.5%); this was  
140 significantly higher than using the genome-wide method for these same genes (median accuracy

141 = 85%, Mann-Whitney U test p-value < 2.2e-16). For genes for which CADD had less predictive  
142 value we found a lower overall performance, but still reached a significantly better result using the  
143 gene-specific approach (median accuracy = 84.5% versus genome-wide 82%, p-value < 2.2e-  
144 16). Lastly, the worst performance was seen for variants in genes with scarce training data  
145 available. The gene-specific performance, however, was still significantly better than using  
146 genome-wide thresholds (median accuracy = 83.5% and 81% respectively, p-value = 2.2e-16).  
147 See **Figure 2**.

148

## 149 **DISCUSSION**

150 We have developed GAVIN, a method for automated variant classification using gene-specific  
151 calibration of classification thresholds for benign and pathogenic variants.

152 Our results show that GAVIN is a powerful classifier with consistently high performance in  
153 clinically relevant genes. The robustness of our method arises from a calibration strategy that first  
154 corrects for calibration bias between benign and pathogenic variants, in terms of consequence  
155 and rarity, before calculating the classification thresholds. A comprehensive benchmark  
156 demonstrates a unique combination of high sensitivity (>90%) and high specificity (>70%) for  
157 variants in genes related to different organ systems. This is a significant improvement over  
158 existing tools that tend to achieve either a high sensitivity (CADD, MSC) or a high specificity  
159 (PredictSNP2). A high sensitivity is crucial for clinical interpretation because pathogenic variants  
160 should not be falsely discarded. In addition, having a higher specificity means that the results will  
161 be far less 'polluted' with false-positives and thus less risk of patients being given a wrong  
162 molecular diagnosis. GAVIN decreases false-positives by about 20% compared to using CADD  
163 for the same purpose, thereby reducing the interpretation time considerably. The difference  
164 between using a high and low performance method can be dramatic in practice. In a hypothetical  
165 example, GAVIN would make downstream variant interpretation twice as effective as a low  
166 performance method, with more sensitive detection of pathogenic variants.

167 Even though an optimal combination of sensitivity and specificity may be favorable in  
168 general terms, there may still be a need for tools that perform differently. The MSC gene-specific

169 thresholds based on HGMD[24] at 99% confidence interval show a very high sensitivity (97.1%),  
170 but at the expense of a very low specificity (25.7%). Such low specificity thresholds will pick up  
171 almost all the pathogenic variants with scores exceeding gene thresholds. This allows safe  
172 removal (<3% error) of benign variants that fall below these thresholds, which was their authors'  
173 aim. However, this tool cannot detect pathogenic variants due its low specificity. Other tools, such  
174 as PON-P2, may show a relatively low performance, but not necessarily because of true errors.  
175 Such tools may simply be very 'picky' and only return a classification when the verdict carries  
176 high confidence. If we ignore the variants that PON-P2 did not classify, and only consider how  
177 many of the variants that it did classify were correct, we find a positive predictive value of 96%,  
178 and a negative predictive value of 94%. Thus, while this tool might not be useful for exome  
179 screening because too many pathogenic variants would be lost, it can still be an excellent choice  
180 for further investigation of interesting variants. We would therefore emphasize that appropriate  
181 tools should be selected depending on the question or analysis protocol used and by taking their  
182 strengths and weaknesses into account.

183 Not surprisingly, we could confirm that the use of gene-specific thresholds instead of  
184 genome-wide thresholds led to a consistent and significant improvement of classification  
185 performance. This shows the added value of our strategy. Overall performance was slightly lower  
186 in genes for which CADD has limited predictive value, and even lower in genes with few 'gold  
187 standard' pathogenicity data available. Evaluating variants in uncharacterized genes is rare in  
188 clinical diagnostics, although it may occur when exome sequencing is aimed at solving complex  
189 phenotypes or undiagnosed cases. Nevertheless, GAVIN is likely to improve continuously in an  
190 increasing number of genes, propelled by the speed at which pathogenic variants are now being  
191 reported.

192 With GAVIN we were also able to demonstrate the residual power of CADD scores as a  
193 predictor for pathogenicity on a gene-by-gene basis, revealing that the scores are informative for  
194 many genes (these results can be accessed at <http://molgenis.org/gavin>). There are several  
195 possible explanations for potential non-informativity of CADD scores. It may have bias towards  
196 the *in silico* tools and sources it was trained on, limiting their predictiveness for certain genomic

197 regions or disease mechanisms[25]. Furthermore, calibration of pathogenic variants could be  
198 difficult in genes with high damage tolerance, i.e. having many missense or loss-of-function  
199 mutations[26]. In addition, calibration may be impaired by false input signals, such as an incorrect  
200 pathogenic classification in ClinVar or inclusion of disease cohorts in large databases such as  
201 ExAC could misrepresent allele frequencies[27]. Lastly, pathogenic variants could have a low  
202 penetrance or their effect mitigated by genetic modifiers, causing high deleteriousness to be  
203 tolerated in the general population against expectations[28].

204         The field of clinical genomics is now moving towards interpretation of non-coding disease  
205 variants (NCVs) identified by whole-genome sequencing[29]. A number of recently introduced  
206 metrics, including EIGEN[30], FATHMM-MKL, DeepSEA[31], and GWAVA, specialize in  
207 predicting the functional effects of non-coding sequence variation. When a pathogenic NCV  
208 reference set of reasonable quantity becomes available, a calibration strategy as described here  
209 will be essential to be able to use these metrics effectively in whole-genome diagnostics.

210

## 211 **CONCLUSIONS**

212 GAVIN provides an automated decision-support protocol for classifying variants, which will  
213 continue to improve in scope and precision as more data is publicly shared by genome diagnostic  
214 laboratories. Our approach bridges the gap between estimates of genome-wide and population-  
215 wide variant pathogenicity and contributes to their practical usefulness for interpreting clinical  
216 variants in specific patient populations. Databases such as ClinVar contain a wealth of implicit  
217 rules now used manually by human experts to classify variants. These rules are deduced and  
218 employed by GAVIN to classify variants that have not been seen before.

219         We envision GAVIN accelerating NGS diagnostics and becoming particularly beneficial  
220 as a powerful (clinical) exome screening tool. It can be used to quickly and effectively detect over  
221 90% of pathogenic variants in a given data set and to present these results with an  
222 unprecedented small number of false-positives. It may especially serve laboratories that lack the  
223 resources necessary to perform reliable and large-scale manual variant interpretation for their  
224 patients, and spur the development of more advanced gene-specific classification methods. We



225 provide GAVIN as an online MOLGENIS[32] web service to browse gene calibration results and  
226 annotate VCF files, and as a commandline executable including open source code for use in  
227 bioinformatic pipelines. GAVIN can be found at <http://molgenis.org/gavin>.

228

## 229 **METHODS**

230

### 231 **Calibration of gene-specific thresholds**

232 We downloaded ClinVar (variant\_summary.txt.gz from ClinVar FTP, last modified date: 05/11/15)  
233 and selected GRCh37 variants that contained the word “pathogenic” in their clinical significance.  
234 These variants were matched against the ClinVar VCF release (clinvar.vcf.gz, last modified date:  
235 01/10/15) using RS (Reference SNP) identifiers in order to resolve missing indel notations. On  
236 the resulting VCF, we ran SnpEff version 4.1L with these settings: hg19 -noStats -noLog -lof -  
237 canon -ud 0. As a benign reference set, we selected variants from ExAC (release 0.3, all sites)  
238 from the same genic regions with +/- 100 bases of padding on each side to capture more variants  
239 residing on the same exon.

240 We first determined the thresholds for gene-specific pathogenic allele frequency by taking  
241 the ExAC allele frequency of each pathogenic variant, or assigning zero if the variant was not  
242 present in ExAC, and calculating the 95<sup>th</sup> percentile value per gene using the R7 method from  
243 Apache Commons Math version 3.5. We filtered the set of benign variants with this threshold to  
244 retain only variants that were rare enough to fall into the pathogenic frequency range.

245 Following this step, the pathogenic impact distribution was calculated as the relative  
246 proportion of the generalized effect impact categories, as annotated by SnpEff on the pathogenic  
247 variants. The same calculation was performed for the benign variants using the variant Ensembl  
248 VEP[33] consequence types already present in ExAC. To facilitate this, we defined a trivial  
249 mapping of VEP consequence types (being equivalent to SnpEff consequences) to SnpEff  
250 impact categories. The benign variants were subsequently downsized to match the impact  
251 distribution of the pathogenic variants.

252 For instance, in the case of 407 pathogenic MYH7 variants, we found a pathogenic allele  
253 frequency threshold of 9.494e-05, and an impact distribution of 5.41% HIGH, 77.4%  
254 MODERATE, 17.2% LOW and 0% MODIFIER. We defined a matching set of benign variants by  
255 retrieving 1,799 MYH7 variants from ExAC (impact distribution: 2.1% HIGH, 23.52%  
256 MODERATE, 32.07% LOW, 42.32% MODIFIER), from which we excluded known ClinVar  
257 pathogenic variants (n = 99), variants above the AF threshold (n = 377), and removed  
258 interspersed variants using a non-random 'step over' algorithm until the impact distribution was  
259 equalized (n = 862). We thus reached an equalized set of 461 variants. This process was  
260 repeated for 3,055 genes.

261 We then obtained the CADD scores for all variants and tested whether there was a  
262 significant difference in scores between the sets of pathogenic and benign variants for each gene,  
263 using a Mann-Whitney U test. Per gene we determined the mean CADD score for each group,  
264 and also the 95<sup>th</sup> percentile sensitivity threshold (detection of most pathogenic variants while  
265 accepting false-positives) and 95<sup>th</sup> percentile specificity threshold (detection of most benign  
266 variants while accepting false-negatives), using the Percentile R7 function. All statistics were  
267 done with Apache Commons Math version 3.5.

268 On average, CADD scores were informative of pathogenicity. The mean benign variant  
269 CADD score across all genes was 23.68, while the mean pathogenic variant CADD score was  
270 28.45, a mean difference of 4.77 ( $\sigma = 4.69$ ). Of 3,055 genes that underwent the calibration  
271 process, we found 520 "CADD predictive" genes that had a significantly higher CADD score for  
272 pathogenic variants than for benign variants (Mann-Whitney U test, p-value <0.05). Interestingly,  
273 we also found 660 "CADD less predictive" genes, for which there was no proven difference  
274 between benign and pathogenic variants (p-value >0.05 despite having  $\geq 5$  pathogenic and  $\geq 5$   
275 benign variants in the gene). For 737 genes there was very little calibration data available (<5  
276 pathogenic or <5 benign variants), resulting in no significant difference (p-value >0.05) between  
277 CADD scores of pathogenic and benign variants. We found 309 genes for which effect impact  
278 alone was predictive, meaning that a certain impact category was unique for pathogenic variants  
279 compared to benign variants. For instance, when observing HIGH impact pathogenic variants

280 (frame shift, stopgain, etc.) for a given gene, whereas benign variants only reached MODERATE  
281 impact (missense, inframe insertion, etc.). No further CADD calibration was performed on these  
282 genes. See <http://www.molgenis.org/gavin> for a full table of gene calibration outcomes.

283

#### 284 **Variant sets for benchmarking**

285 We obtained six variant sets that had been classified by human experts. These data sets were  
286 used to benchmark the *in silico* variant pathogenicity prediction tools mentioned in this paper.  
287 Variants from the original sets may sometimes be lost due to conversion of cDNA/HGVS notation  
288 to VCF.

289         The VariBench protein tolerance data set 7 (<http://structure.bmc.lu.se/VariBench/>)  
290 contains disease-causing missense variations from the PhenCode[34] database, IDbases[35],  
291 and 18 individual LSDBs[11]. The training set we used contained 17,490 variants, of which  
292 11,347 were benign and 6,143 pathogenic. The test set contained 1,887 variants, of which 1,377  
293 were benign and 510 pathogenic. We used both the training set and test set as benchmarking  
294 sets.

295         The MutationTaster2[12] test set contains known disease mutations from HGMD[24]  
296 Professional and putatively harmless polymorphisms from 1000 Genomes. It is available at  
297 [http://www.mutationtaster.org/info/Comparison\\_20130328\\_with\\_results\\_ClinVar.html](http://www.mutationtaster.org/info/Comparison_20130328_with_results_ClinVar.html). This set  
298 contains 1,355 variants, of which 1,194 are benign and 161 pathogenic.

299         We selected 1,688 pathogenic variants from ClinVar that were added between November  
300 2015 and February 2016 as an additional benchmarking set, since our method was based on the  
301 November 2015 release of ClinVar. We supplemented this set with a random selection of 1,668  
302 benign variants from ClinVar, yielding a total of 3,356 variants.

303         We obtained an in-house list of 2,359 variants that had been classified by molecular and  
304 clinical geneticists at the University Medical Center Groningen. These variants belong to patients  
305 seen in the context of various disorders: cardiomyopathies, epilepsy, dystonia, preconception  
306 carrier screening, and dermatology. Variants were analyzed according to Dutch medical center  
307 guidelines[36] for variant interpretation, using Cartagenia Bench Lab™ (Agilent Technologies)

308 and Alamut® software (Interactive Biosoftware) by evaluating in-house databases, known  
309 population databases (1000G[37], ExAC, ESP6500 at <http://evs.gs.washington.edu/EVS/>,  
310 GoNL[38]), functional effect and literature searches. Any ClinVar variants included in the  
311 November 2015 release were removed from this set to prevent circular reasoning, resulting in a  
312 total of 1,512 variants, with 1,176 benign/likely benign (merged as Benign), 162 VUS, and 174  
313 pathogenic/likely pathogenic (merged as Pathogenic).

314 From the UMCG diagnostics laboratory we also obtained a list of 607 variants seen in the  
315 context of familial cancers. These were interpreted by a medical doctor according to ACMG  
316 guidelines[7]. We removed any ClinVar variants (November 2015 release), resulting in 395  
317 variants, with 301 benign/likely benign (merged as Benign), 68 VUS and 26 likely  
318 pathogenic/pathogenic (merged as Pathogenic).

319

#### 320 **Variant data processing and preparation**

321 We used Ensembl VEP ([http://grch37.ensembl.org/Homo\\_sapiens/Tools/VEP/](http://grch37.ensembl.org/Homo_sapiens/Tools/VEP/)) to convert  
322 cDNA/HGVS notations to VCF format. Newly introduced N-notated reference bases were  
323 replaced with the appropriate GRCh37 base, and alleles were trimmed where needed (e.g.  
324 “TA/TTA” to “T/TT”). We annotated with SnpEff (version 4.2) using the following settings: hg19 -  
325 noStats -noLog -lof -canon -ud 0. CADD scores (version 1.3) were added by running the variants  
326 through the CADD webservice (available at <http://cadd.gs.washington.edu/score>). ExAC (release  
327 0.3) allele frequencies were added with MOLGENIS annotator (release 1.16.2). We also merged  
328 all benchmarking sets into a combined file with 25,995 variants (of which 25,765 classified as  
329 benign, likely benign, likely pathogenic or pathogenic) for submission to various online *in silico*  
330 prediction tools.

331

#### 332 **Execution of *in silico* predictors**

333 The combined set of 25,765 variants was classified by the *in silico* variant pathogenicity  
334 predictors (MSC, CADD, SIFT, PolyPhen2, PROVEAN, Condel, PON-P2, PredictSNP2,  
335 FATHMM, GWAVA, FunSeq, DANN). The output of each tool was loaded into a program that

336 compared the observed output to the expected classification and which then calculated  
337 performance metrics such as sensitivity and specificity. The tools that we evaluated and the web  
338 addresses used can be found in **Supplementary Table 2**. We executed PROVEAN and SIFT, for  
339 which the output was reduced by retaining the following columns: "INPUT", "PROVEAN  
340 PREDICTION (cut-off = -2.5)" and "SIFT PREDICTION (cut-off = 0.05)". For PONP-2, the output  
341 was left as-is. The Mutation Significance Cutoff (MSC) thresholds are configurable; we  
342 downloaded the ClinVar-based thresholds for CADD 1.3 at 95% confidence interval, comparable  
343 to our method, as well as HGMD-based thresholds at 99% confidence interval, the default setting.  
344 Variants below the gene-specific thresholds were considered benign, and above the threshold  
345 pathogenic. We obtained CADD scores of version 1.3. Following the suggestion of the CADD  
346 authors, scores of variants below a threshold of 15 were considered benign, above this threshold  
347 pathogenic. The output of Condel was reduced by retaining the following columns: "CHR",  
348 "START", "SYMBOL", "REF", "ALT", "MA", "FATHMM", "CONDEL", "CONDEL\_LABEL". After  
349 running PolyPhen2, its output was reduced by retaining the positional information  
350 ("chr2:220285283|CG") and the "prediction" column. Finally, we executed PredictSNP2, which  
351 contains the output from multiple tools. From the output VCF, we used the INFO fields "PSNPE",  
352 "FATE", "GWAVAE", "DANNE" and "FUNNE" for the pathogenicity estimation outcomes according  
353 to the PredictSNP protocol for PredictSNP2 consensus, FATHMM, GWAVA, DANN and FunSeq,  
354 respectively.

355

### 356 **Stratification of variants using Clinical Genomics Database**

357 We downloaded Clinical Genomics Database (CGD; the .tsv.gz version on 1 June 2016 from  
358 <http://research.nhgri.nih.gov/CGD/download/>). A Java program evaluated each variant in the full  
359 set of 25,765 variants and retrieved their associate gene symbols as annotated by SnpEff. We  
360 matched the gene symbols to the genes present in CGD and retrieved the corresponding physical  
361 manifestation categories. Variants were then written out to separate files for each manifestation  
362 category (cardiovascular, craniofacial, renal, etc.). This means a variant may be output into  
363 multiple files if its gene was linked to multiple manifestation categories. However, we did prevent

364 variants from being written out twice to the same file in the case of overlapping genes in the same  
365 manifestation categories. We output a variant into the “NotInCGD” file only if it was not located in  
366 any gene present in CGD.

367

## 368 **Implementation**

369 GAVIN was implemented using Java 1.8 and MOLGENIS[32] 1.16 (<http://molgenis.org>). Source  
370 code with tool implementation details can be found at <https://github.com/molgenis/gavin>. All  
371 benchmarking and bootstrapping tools, as well as all data processing and calibration tools, can  
372 also be found in this source code repository.

373

## 374 **Binary classification metrics**

375 Prediction tools may classify variants as benign or pathogenic, but may also fail to reach a  
376 classification or classify a variant as VUS. Because of these three outcome states, binary  
377 classification metrics must be used with caution. According to standard definitions of ‘sensitivity’,  
378 such as the following example: “Recall or Sensitivity (as it is called in Psychology) is the  
379 proportion of Real Positive cases that are correctly Predicted Positive” (source:  
380 <https://csem.flinders.edu.au/research/techreps/SIE07001.pdf>), we define sensitivity as the  
381 number of detected pathogenic variants (true-positives) over the total number of pathogenic  
382 variants, which includes true-positives, false-negatives (pathogenic variants misclassified as  
383 benign), and pathogenic variants that were otherwise ‘missed’, i.e. classified as VUS or not  
384 classified at all. Therefore,  $Sensitivity = \frac{TruePositive}{TruePositive + False-Negative + MissedPositive}$ . We applied the same definition for specificity, and define it as:  $Specificity = \frac{TrueNegative}{TrueNegative + FalsePositive + MissedNegative}$ . Following this line, accuracy is  
385 then defined as  $(TP + TN) / (TP + TN + FP + FN + MissedPositive + MissedNegative)$ .

388

## 389 **DECLARATIONS**

390

### 391 **Ethics approval and consent to participate**

392 The study was done in accordance with the regulations and ethical guidelines of the University  
393 Medical Center Groningen. Specific ethical approval was not necessary because this study was  
394 conducted on aggregated, fully anonymized data.

395

#### 396 **Consent for publication**

397 Not applicable.

398

#### 399 **Availability of data and material**

400 The datasets generated during and/or analysed during the current study are available in the  
401 GAVIN public GitHub repository, available at <https://github.com/molgenis/gavin>.

402

#### 403 **Competing interests**

404 The authors declare that they have no competing interests.

405

#### 406 **Funding**

407 We thank BBMRI-NL for sponsoring above software development via a voucher. BBMRI-NL is a  
408 research infrastructure financed by the Netherlands Organization for Scientific Research (NWO),  
409 grant number 184.033.111.

410

#### 411 **Authors' contributions**

412 KV, EB, MS conceived the method. KV, EB, CD, BS, KA, LF, CW, RHS, RJS and TK helped to  
413 fine-tune the method, accumulate relevant validation data and evaluate the results. KV, MS  
414 drafted the manuscript. KV, EB, CD, BS, KA, AK, LF, FS, TK, CW, RHS, RJS, MS edited and  
415 reviewed the manuscript.

416

#### 417 **Acknowledgements**

418 We thank Jackie Senior, Kate Mc Intyre and Diane Black for editorial advice. We thank the  
419 MOLGENIS team for assistance with the software implementation and the GAVIN user interface:

420 Bart Charbon, Fleur Kelpin, Mark de Haan, Erwin Winder, Tommy de Boer, Jonathan Jetten,  
421 Dennis Hendriksen, Chao Pang.

422

## 423 REFERENCES

- 424 1. Berg JS, Khoury MJ, Evans JP: **Deploying whole genome sequencing in clinical practice**  
425 **and public health: Meeting the challenge one bin at a time.** *Genet Med* 2011, **13**:499–504.
- 426 2. Cooper GM, Shendure J: **Needles in stacks of needles: finding disease-causal variants in**  
427 **a wealth of genomic data.** *Nat Rev Genet* 2011, **12**:628–640.
- 428 3. Kircher M, Witten DM, Jain P, O’Roak BJ, Cooper GM, Shendure J: **A general framework for**  
429 **estimating the relative pathogenicity of human genetic variants.** *Nat Genet* 2014, **46**:310–  
430 315.
- 431 4. van der Velde KJ, Kuiper J, Thompson BA, Plazzer JP, van Valkenhoef G, de Haan M,  
432 Jongbloed JDH, Wijmenga C, de Koning TJ, Abbott KM, Sinke R, Spurdle AB, Macrae F,  
433 Genuardi M, Sijmons RH, Swertz MA: **Evaluation of CADD Scores in Curated Mismatch**  
434 **Repair Gene Variants Yields a Model for Clinical Validation and Prioritization.** *Hum Mutat*  
435 2015.
- 436 5. **Combined Annotation Dependent Depletion (CADD)** [<http://cadd.gs.washington.edu/info>]
- 437 6. Itan Y, Shang L, Boisson B, Ciancanelli MJ, Markle JG, Martinez-Barricarte R, Scott E, Shah I,  
438 Stenson PD, Gleeson J, Cooper DN, Quintana-Murci L, Zhang S-Y, Abel L, Casanova J-L: **The**  
439 **mutation significance cutoff: gene-level thresholds for variant predictions.** *Nat Methods*  
440 2016, **13**:109–110.
- 441 7. Richards S, Aziz N, Bale S, Bick D, Das S, Gastier-Foster J, Grody WW, Hegde M, Lyon E,  
442 Spector E, Voelkerding K, Rehm HL: **Standards and guidelines for the interpretation of**  
443 **sequence variants: a joint consensus recommendation of the American College of Medical**  
444 **Genetics and Genomics and the Association for Molecular Pathology.** *Genet Med* 2015,  
445 **17**:405–423.
- 446 8. Lek M, Karczewski K, Minikel E, Samocha K, Banks E, Fennell T, O’Donnell-Luria A, Ware J,  
447 Hill A, Cummings B, Tukiainen T, Birnbaum D, Kosmicki J, Duncan L, Estrada K, Zhao F, Zou J,



- 448 Pierce-Hoffman E, Cooper D, DePristo M, Do R, Flannick J, Fromer M, Gauthier L, Goldstein J,  
449 Gupta N, Howrigan D, Kiezun A, Kurki M, Levy Moonshine A, et al.: **Analysis of protein-coding**  
450 **genetic variation in 60,706 humans.** *bioRxiv* 2015.
- 451 9. Cingolani P, Platts A, Wang LL, Coon M, Nguyen T, Wang L, Land SJ, Lu X, Ruden DM: **A**  
452 **program for annotating and predicting the effects of single nucleotide polymorphisms,**  
453 **SnEff: SNPs in the genome of *Drosophila melanogaster* strain w(1118); iso-2; iso-3.** *Fly*  
454 (*Austin*) 2012, **6**:80–92.
- 455 10. Landrum MJ, Lee JM, Benson M, Brown G, Chao C, Chitipiralla S, Gu B, Hart J, Hoffman D,  
456 Hoover J, Jang W, Katz K, Ovetsky M, Riley G, Sethi A, Tully R, Villamarin-Salomon R,  
457 Rubinstein W, Maglott DR: **ClinVar: public archive of interpretations of clinically relevant**  
458 **variants.** *Nucleic Acids Res* 2016, **44** (D1 ):D862–D868.
- 459 11. Sasidharan Nair P, Vihinen M: **VariBench: A Benchmark Database for Variations.** *Hum*  
460 *Mutat* 2013, **34**:42–49.
- 461 12. Schwarz JM, Cooper DN, Schuelke M, Seelow D: **MutationTaster2: mutation prediction for**  
462 **the deep-sequencing age.** *Nat Meth* 2014, **11**:361–362.
- 463 13. Solomon BD, Nguyen A-D, Bear KA, Wolfsberg TG: **Clinical Genomic Database.** *Proc Natl*  
464 *Acad Sci* 2013, **110** (24 ):9851–9855.
- 465 14. Kumar P, Henikoff S, Ng PC: **Predicting the effects of coding non-synonymous variants**  
466 **on protein function using the SIFT algorithm.** *Nat Protoc* 2009, **4**:1073–1081.
- 467 15. Adzhubei I a, Schmidt S, Peshkin L, Ramensky VE, Gerasimova A, Bork P, Kondrashov AS,  
468 Sunyaev SR: **A method and server for predicting damaging missense mutations.** *Nat*  
469 *Methods* 2010, **7**:248–9.
- 470 16. Choi Y, Sims GE, Murphy S, Miller JR, Chan AP: **Predicting the Functional Effect of**  
471 **Amino Acid Substitutions and Indels.** *PLoS One* 2012, **7**:e46688.
- 472 17. González-Pérez A, López-Bigas N: **Improving the assessment of the outcome of**  
473 **nonsynonymous SNVs with a consensus deleteriousness score, Condel.** *Am J Hum Genet*  
474 2011, **88**:440–449.
- 475 18. Niroula A, Urolagin S, Vihinen M: **PON-P2: Prediction method for fast and reliable**

- 476 **identification of harmful variants.** *PLoS One* 2015, **10**:1–17.
- 477 19. Bendl J, Musil M, Štourač J, Zendulka J, Damborský J, Brezovský J: **PredictSNP2: A Unified**  
478 **Platform for Accurately Evaluating SNP Effects by Exploiting the Different Characteristics**  
479 **of Variants in Distinct Genomic Regions.** *PLoS Comput Biol* 2016, **12**:e1004962.
- 480 20. Shihab HA, Rogers MF, Gough J, Mort M, Cooper DN, Day INM, Gaunt TR, Campbell C: **An**  
481 **integrative approach to predicting the functional effects of non-coding and coding**  
482 **sequence variation.** *Bioinforma* 2015, **31** (10 ):1536–1543.
- 483 21. Ritchie GRS, Dunham I, Zeggini E, Flicek P: **Functional annotation of noncoding**  
484 **sequence variants.** *Nat Meth* 2014, **11**:294–296.
- 485 22. Fu Y, Liu Z, Lou S, Bedford J, Mu XJ, Yip KY, Khurana E, Gerstein M: **FunSeq2: a**  
486 **framework for prioritizing noncoding regulatory variants in cancer.** *Genome Biol* 2014,  
487 **15**:1–15.
- 488 23. Quang D, Chen Y, Xie X: **DANN: A deep learning approach for annotating the**  
489 **pathogenicity of genetic variants.** *Bioinformatics* 2015, **31**:761–763.
- 490 24. Stenson PD, Mort M, Ball E V, Shaw K, Phillips AD, Cooper DN: **The Human Gene Mutation**  
491 **Database: building a comprehensive mutation repository for clinical and molecular**  
492 **genetics, diagnostic testing and personalized genomic medicine.** *Hum Genet* 2014, **133**:1–  
493 9.
- 494 25. Mather CA, Mooney SD, Salipante SJ, Scroggins S, Wu D, Pritchard CC, Shirts BH: **CADD**  
495 **score has limited clinical validity for the identification of pathogenic variants in noncoding**  
496 **regions in a hereditary cancer panel.** *Genet Med* 2016.
- 497 26. Itan Y, Shang L, Boisson B, Patin E, Bolze A, Moncada-Vélez M, Scott E, Ciancanelli MJ,  
498 Lafaille FG, Markle JG, Martinez-Barricarte R, de Jong SJ, Kong X-F, Nitschke P, Belkadi A,  
499 Bustamante J, Puel A, Boisson-Dupuis S, Stenson PD, Gleeson JG, Cooper DN, Quintana-Murci  
500 L, Claverie J-M, Zhang S-Y, Abel L, Casanova J-L: **The human gene damage index as a gene-**  
501 **level approach to prioritizing exome variants.** *Proc Natl Acad Sci* 2015, **112** (44 ):13615–  
502 13620.
- 503 27. Song W, Gardner SA, Hovhannisyan H, Natalizio A, Weymouth KS, Chen W, Thibodeau I,

- 504 Bogdanova E, Letovsky S, Willis A, Nagan N: **Exploring the landscape of pathogenic genetic**  
505 **variation in the ExAC population database: insights of relevance to variant classification.**  
506 *Genet Med* 2015.
- 507 28. Cooper DN, Krawczak M, Polychronakos C, Tyler-Smith C, Kehrer-Sawatzki H: **Where**  
508 **genotype is not predictive of phenotype: Towards an understanding of the molecular basis**  
509 **of reduced penetrance in human inherited disease.** *Human Genetics* 2013:1077–1130.
- 510 29. Zhang F, Lupski JR: **Non-coding genetic variants in human disease.** *Human Molecular*  
511 *Genetics* 2015:R102–R110.
- 512 30. Ionita-Laza I, McCallum K, Xu B, Buxbaum JD: **A spectral approach integrating functional**  
513 **genomic annotations for coding and noncoding variants.** *Nat Genet* 2016, **48**:214–220.
- 514 31. Zhou J, Troyanskaya OG: **Predicting effects of noncoding variants with deep learning-**  
515 **based sequence model.** *Nat Meth* 2015, **12**:931–934.
- 516 32. Swertz MA, Dijkstra M, Adamusiak T, van der Velde JK, Kanterakis A, Roos ET, Lops J,  
517 Thorisson GA, Arends D, Byelas G, Muilu J, Brookes AJ, de Brock EO, Jansen RC, Parkinson H:  
518 **The MOLGENIS toolkit: rapid prototyping of biosoftware at the push of a button.** *BMC*  
519 *Bioinformatics* 2010, **11 Suppl 1**:S12.
- 520 33. McLaren W, Gil L, Hunt SE, Riat HS, Ritchie GRS, Thormann A, Flicek P, Cunningham F:  
521 **The Ensembl Variant Effect Predictor.** *bioRxiv* 2016.
- 522 34. Giardine B, Riemer C, Hefferon T, Thomas D, Hsu F, Zielenski J, Sang Y, Elnitski L, Cutting  
523 G, Trumbower H, Kern A, Kuhn R, Patrinos GP, Hughes J, Higgs D, Chui D, Scriver C,  
524 Phommarinh M, Patnaik SK, Blumenfeld O, Gottlieb B, Vihinen M, Väliäho J, Kent J, Miller W,  
525 Hardison RC: **PhenCode: connecting ENCODE data with mutations and phenotype.** *Hum*  
526 *Mutat* 2007, **28**:554–562.
- 527 35. Piirilä H, Väliäho J, Vihinen M: **Immunodeficiency mutation databases (IDbases).** *Hum*  
528 *Mutat* 2006, **27**:1200–1208.
- 529 36. **Association of Clinical Genetics Netherlands**  
530 [<http://vkgn.org/index.php/vakinformatie/richtlijnen-en-protocollen>]
- 531 37. The 1000 Genomes Project: **A global reference for human genetic variation.** *Nature* 2015,

532 526:68–74.

533 38. The Genome of the Netherlands Consortium: **Whole-genome sequence variation,**

534 **population structure and demographic history of the Dutch population.** *Nat Genet* 2014,

535 **46:818–825.**

536

537 **Figure 1.** Performance of GAVIN and other tools across different clinical gene sets. Prediction

538 quality is measured as sensitivity and specificity, i.e. the fraction of pathogenic variants correctly

539 identified and the fraction of mistakes made while doing so.

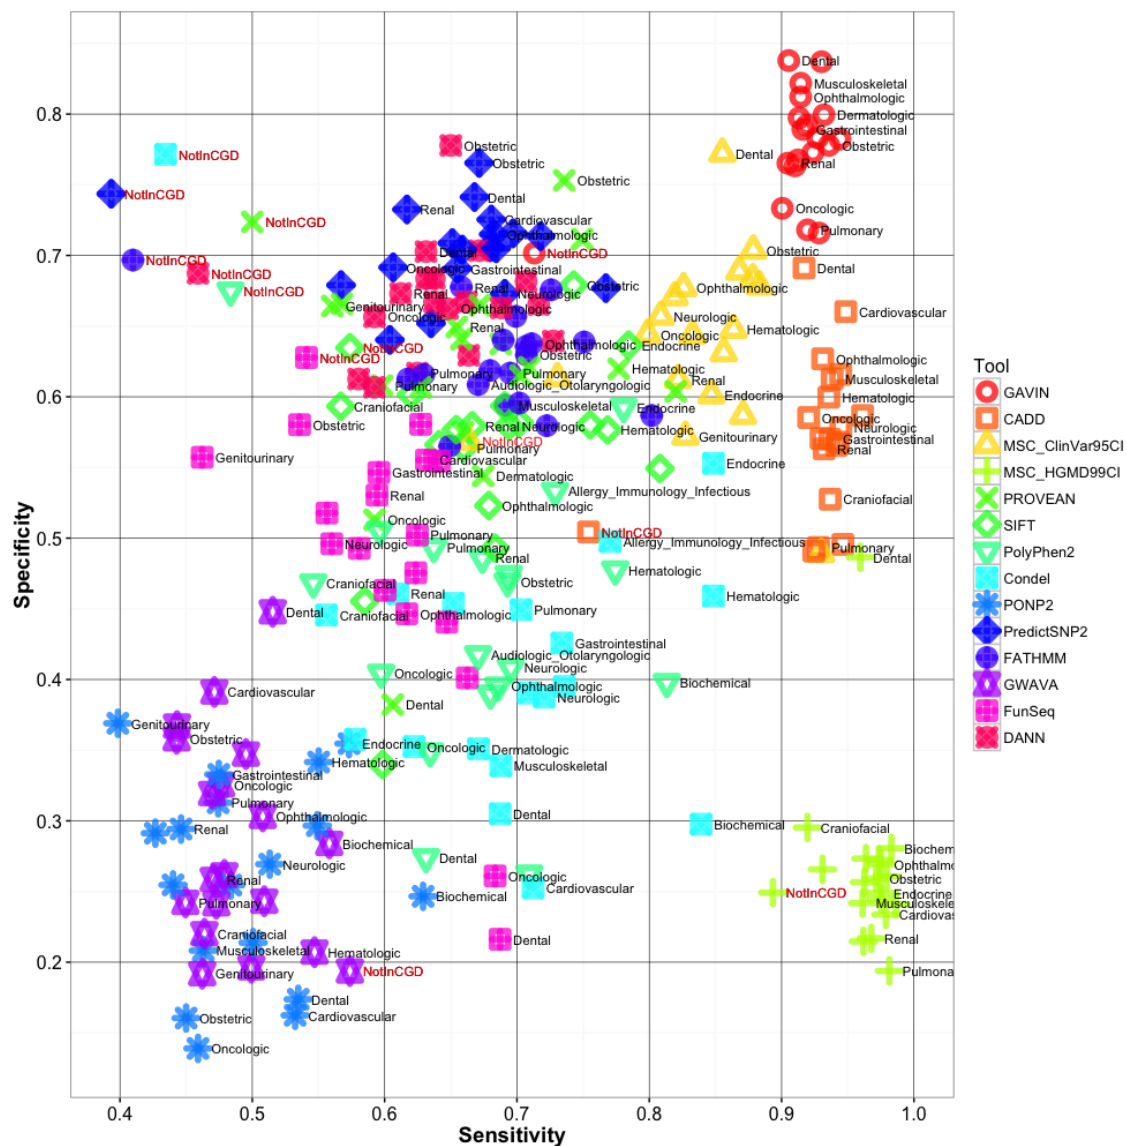

540

541

542 **Figure 2.** Comparison of gene-specific classification thresholds with genome-wide fixed  
 543 thresholds in three groups of genes: 520 genes for which CADD is predictive, 660 genes for  
 544 which CADD is less predictive, and 737 genes with scarce training data. For each group, 10,000  
 545 sets of 100 benign and 100 pathogenic variants were randomly sampled and tested from the full  
 546 set of 25,765 variants and accuracy was calculated for gene-specific and genome-wide CADD  
 547 and MAF thresholds.

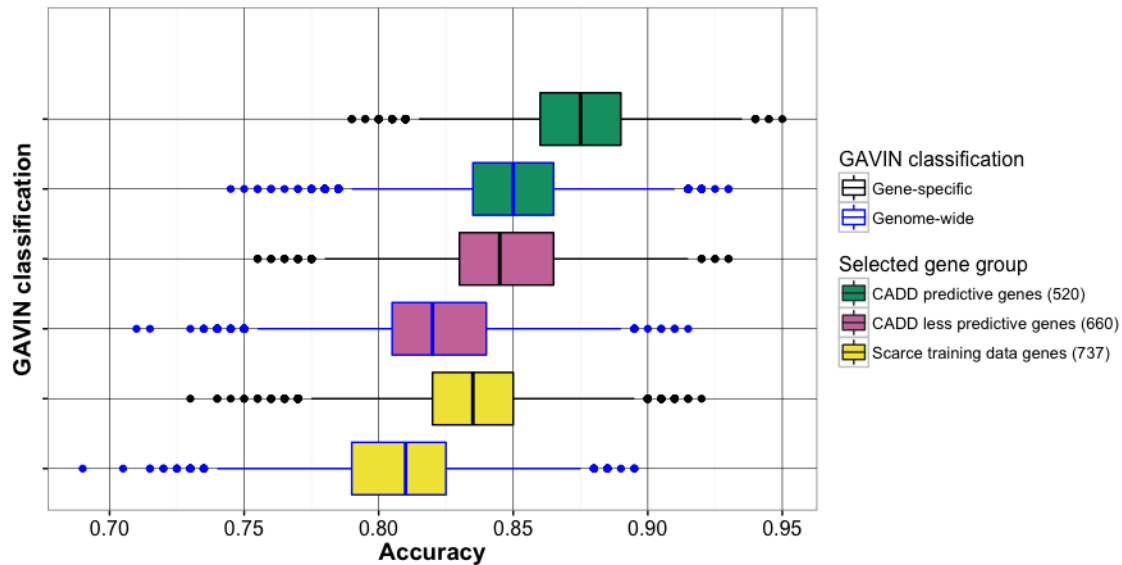

548

549

550 **Table 1.**

| Data set                                                                 | Nr. of benign variants | Nr. of pathogenic variants | Origin                                                                                                                     |
|--------------------------------------------------------------------------|------------------------|----------------------------|----------------------------------------------------------------------------------------------------------------------------|
| VariBench tolerance DS7, training set                                    | 11,347                 | 6,143                      | PhenCode database, IDbases, and 18 individual LSDBs                                                                        |
| VariBench tolerance DS7, test set                                        | 1,377                  | 510                        | PhenCode database, IDbases, and 18 individual LSDBs                                                                        |
| MutationTaster2 benchmark set                                            | 1,194                  | 161                        | HGMD Professional and 1000 Genomes                                                                                         |
| ClinVar (additions of Nov 2015 to Feb 2016)                              | 1,668                  | 1,688                      | Submissions by clinical molecular geneticists, expert panels, diagnostic laboratories and companies                        |
| UMCG, variants exported from clinical diagnostic interpretation software | 1,176                  | 174                        | Clinical diagnostic classifications of variants in cardiology, dermatology, epilepsy, dystonia and preconception screening |
| UMCG, germline variants for familial cancer cases                        | 301                    | 26                         | Hereditary cancer variant classifications by an M.D. following ACMG guidelines                                             |
| <b>Total</b>                                                             | <b>17,063</b>          | <b>8,702</b>               | <b>25,765</b>                                                                                                              |

551 Variant and classification origins of the benchmark data sets used.

552

553 **Table 2.**

| <b>CGD manifestation panel</b>    | <b>Genes</b> | <b>Variants</b> |
|-----------------------------------|--------------|-----------------|
| Allergy / Immunology / Infectious | 253          | 1,952           |
| Audiologic / Otolaryngologic      | 217          | 1,215           |
| Biochemical                       | 354          | 2,538           |
| Cardiovascular                    | 446          | 4,360           |
| Craniofacial                      | 387          | 1,861           |
| Dental                            | 80           | 783             |
| Dermatologic                      | 345          | 2,749           |
| Endocrine                         | 240          | 1,801           |
| Gastrointestinal                  | 338          | 2,351           |
| Genitourinary                     | 149          | 1,026           |
| Hematologic                       | 267          | 2,571           |
| Musculoskeletal                   | 676          | 4,935           |
| Neurologic                        | 1,012        | 6,363           |
| Obstetric                         | 34           | 223             |
| Oncologic                         | 203          | 2,157           |
| Ophthalmologic                    | 479          | 3,649           |
| Pulmonary                         | 90           | 717             |
| Renal                             | 302          | 2,143           |
| <i>NotInCGD</i>                   | <i>5,806</i> | <i>11,679</i>   |

554 Stratification of the combined variant data set into manifestation categories. The categories are  
555 defined by Clinical Genomics Database and are associated to clinically relevant genes. Variants  
556 were allocated to the manifestation categories based on their gene, and were placed in multiple  
557 categories if a gene was associated to multiple manifestations.

558

559 **Table 3.**

| <b>Tool</b>     | <b>Median Sensitivity</b> | <b>Median Specificity</b> |
|-----------------|---------------------------|---------------------------|
| CADD            | 93.6%                     | 57.1%                     |
| Condel          | 70.3%                     | 39.5%                     |
| DANN            | 63.8%                     | 66.7%                     |
| FATHMM          | 69.5%                     | 61.9%                     |
| FunSeq          | 61.7%                     | 50.2%                     |
| GAVIN           | 91.6%                     | 78.2%                     |
| GWAVA           | 47.6%                     | 26.2%                     |
| MSC_ClinVar95CI | 84.7%                     | 64.4%                     |

|              |       |       |
|--------------|-------|-------|
| MSC_HGMD99CI | 97.1% | 25.7% |
| PolyPhen2    | 68.0% | 46.8% |
| PONP2        | 47.5% | 26.9% |
| PredictSNP2  | 66.8% | 70.6% |
| PROVEAN      | 65.9% | 62.1% |
| SIFT         | 67.9% | 57.9% |

560 Performance overview of all tested tools.

561

562 **Table 4.**

| <i>Hypothetical data set:</i> | <b>90% sensitive method</b> | <b>70% sensitive method</b> |                                  |
|-------------------------------|-----------------------------|-----------------------------|----------------------------------|
| 100 benign variants           | 9 pathogenic found          | 7 pathogenic found          |                                  |
| 10 pathogenic variants        | 1 pathogenic missed         | 3 pathogenic missed         |                                  |
| <b>80% specific method</b>    | 9+20 = 29                   | 7+20 = 27                   | <i>Variants to interpret</i>     |
| 80 benign found               | 9/29 = <b>31%</b>           | 7/27 = <b>26%</b>           | <i>Positive Predictive Value</i> |
| 20 benign missed              |                             |                             |                                  |
| <b>60% specific method</b>    | 9+40 = 49                   | 7 + 40 = 47                 | <i>Variants to interpret</i>     |
| 60 benign found               | 9/49 = <b>18%</b>           | 7/47 = <b>15%</b>           | <i>Positive Predictive Value</i> |
| 40 benign missed              |                             |                             |                                  |

563 The practical impact in clinical diagnostics of using methods of different sensitivity and specificity

564 on a data set with 100 benign and 10 pathogenic variants.

565

566 **Supplementary Table 1.**

567 Detailed overview of all benchmark results. Each combination of tool and data set is listed. We

568 provide the raw counts of true-positives (TP), true-negatives (TN), false-positives (FP) and false-

569 negatives (FN), as well as of pathogenic and benign variants that were 'missed', i.e. not correctly

570 identified as such. From these numbers we calculated the sensitivity and specificity.

571

572 **Supplementary Table 2.**

573 The tools used to evaluate our benchmark variant set, and the web addresses used through

574 which they were accessed.
